# Supplementary material
Source: publisher figshare collection journal article supplement (https://tandf.figshare.com/articles/dataset/_/5355007)
Supplement: Supplementary file 1 [file 1]

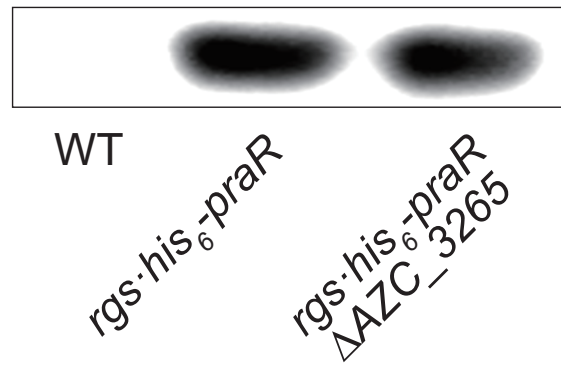

**Fig. S2.** Western blotting to investigate the effects of AZC\_3265 deletion on RGS·His<sub>6</sub>-PraR expression. Whole cell lysates from the WT, *rgs·his<sub>6</sub>-praR*, and *rgs·his<sub>6</sub>-praRΔAZC\_3265* strains grown in the BD medium at 26 °C were electrophoresed. RGS·His<sub>6</sub>-PraR was detected by using the anti-His<sub>5</sub> antibody (Qiagen). This experiment was performed as described previously (Matsuoka *et al.* 2017).
