# Supplementary material
Source: publisher figshare collection journal article supplement (https://tandf.figshare.com/articles/dataset/_/5355007)
Supplement: Supplementary file 2 [file 1]

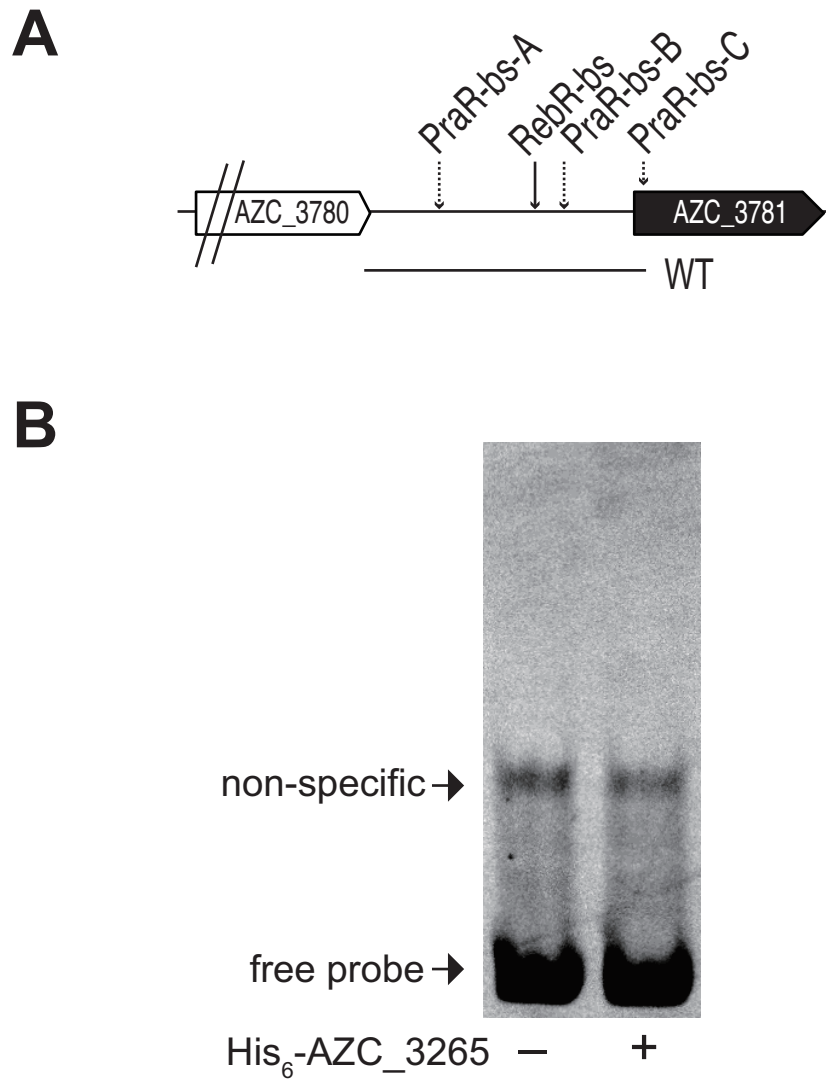

**Fig. S1.** EMSA analysis to investigate the binding affinity of His<sub>6</sub>-AZC\_3265 to the *reb* promoter. (A) The region of the fluorescein isothiocyanate (FITC)-labeled dsDNA probe used in EMSA. (B) EMSA of dsDNA probes incubated with (+) or without (-) His<sub>6</sub>-AZC\_3265 was performed as described previously (Matsuoka *et al.* 2017).
